# Supplementary material
Source: PubMed Central journal article supplement (PMC4197910)
Supplement: NIHMS632704-supplement.pdf [file NIHMS632704-supplement.pdf]

**A. Farm**

**Farm ID:**

1. Number of people working on the farm : Men          Women          *(ICC=0.800, p=0.03)*
2. Do you belong to an association of producers? Yes  No
3. How many animals do you have? *(ICC=0.82, p=0.038)*

|                |  |
|----------------|--|
| Lactating cows |  |
| Dry cows       |  |
| Calves/heifers |  |
| Bulls/Steers   |  |
| Totál          |  |

4. ¿Do you sell or buy your cattle at the public auctions? Yes  No  *(κ=0.55, p=0.013)*
5. If so, how many did you buy/sell in the past year?  
 Bought :          Sold :
6. How much milk does your farm produce per day? *(ICC=0.45, p=0.52)*
7. ¿To whom do you sell your milk? *(κ=1.00, p=0.01)*

|              |  |         |
|--------------|--|---------|
|              |  | Price/L |
| Gloria       |  |         |
| Nestle       |  |         |
| Cheesemakers |  |         |
| Open market  |  |         |

8. ¿Who performs the following services on your farm ? :

|                         | Not done                 | Veterinarian             | Technician               | Friend/Neighbor          | Yourself                 |
|-------------------------|--------------------------|--------------------------|--------------------------|--------------------------|--------------------------|
| Artificial Insemination | <input type="checkbox"/> |
| Vaccinations            | <input type="checkbox"/> |
| Antiparasitic dosing    | <input type="checkbox"/> |
| Disease treatment       | <input type="checkbox"/> |

9. Would you like the vet to visit your farm more often ? Yes  No
10. If so, why do you not have the vet come more often ?

- Price of services too high           Vet's treatments don't work   
 Distance/difficult access           Unavailability of the vet   
 Difficult to contact the vet

**B. ANTIBIOTICS/TREATMENTS:**

11. Last year, did you administer antibiotics to your animals ? Yes  No
12. If so, which ones?
13. Do you know what an antibiotic is ? Yes  No  *(κ=1.00, p=0.002)*

If so, how would you define an antibiotic?

14. Where do you buy your antibiotics ?          *(κ=1.00, p=0.001)*  
 Vet   
 Feed store   
 Promoters/drug reps

15. Last year, how many of the following occurred ? ( $ICC=0.80, p=0.028$ )

|                           | # episodes without Treatment | # episodes with Treatment | Name of drugs used |
|---------------------------|------------------------------|---------------------------|--------------------|
| Mastitis                  |                              |                           |                    |
| Illness after parturition |                              |                           |                    |
| Respiratory illness       |                              |                           |                    |
| Diarrhea                  |                              |                           |                    |
| Skin infections           |                              |                           |                    |
| Bloating                  |                              |                           |                    |

16. If you treat your animals yourself, where do you get information on how to do so?

Veterinarian  Feed store  Friends/neighbors  Training  Other

17. ¿Do you give antibiotics to prevent disease? Yes  No

18. If so, for what ?

After parturition

To dry the cow

When other animals on the farm are sick

20. When a cow is being treated with antibiotics, is she :

Visibly marked?  Milked last?

21. When a Treatment doesn't work, what do you do ?

Increase the dose

Change drugs

Sell the cow

22. When you buy antibiotics, what factors do you take into account?:

Order of importance

Price

Brand

Packaging

Quality

Easy to obtain

Recommendation of the

vet/vendor

Previous experience

23. ¿Do you always give the dose/# of treatments recommended by the prescriber? Yes  No

If not, why?

Not enough money

The cow appears healed

The Treatment doesn't work

Because the milk production decreases

Because of side effects

24. When an animal is being treated with antibiotics, what do you do with her milk ?

Feed to calves

Continue selling it

Consumed by family

Feed to dogs

Thrown away

(If any answer other than the second) For how long ?

25. Do you know what drug withdrawal/withholding times are? Yes  No  ( $\kappa=1.00, p=0.002$ )

If so, can you define them?

26. Do you believe that using antibiotics can result in any of the following?

**Danger to the animal**

Allergic reaction Yes  No  Don't know  ( $\kappa=0.75, p=0.0001$ )

Using the same antibiotic frequently can diminish the effectiveness of the drug Yes  No  Don't know  ( $\kappa=1.00, p=0.002$ )

**Danger to the consumer**

Pose a risk to consumers who drink milk from cows treated with Antibiotics Yes  No  Don't know  ( $\kappa=1.00, p=0.002$ )

27. Have you ever observed any complications/side effects after administering antibiotics ?

Yes  No  If so, which ones ? ( $\kappa=1.00, p=0.002$ )

**C. MANAGEMENT**

28. Do you clean the cow's udder before milking?

Never  Sometimes  Always

29. If so, with what ?

Water  Water+soap  Disinfectant

30. Do you wash your hands:

Before milking Never  Sometimes  Always

Between each cow Never  Sometimes  Always

31. Do you seal the cow's teats with iodine after milking?

Never  Sometimes  Always

32. Have you or your vet ever done tests to look for sub-clinical mastitis (CMT)?

Yes  No

33. Do you feed your cows concentrates? ( $\kappa=0.52, p=0.017$ )

- Never   
 Sometimes   
 Every day

**D. FARMER**

34. Age

35. What percent of your total income comes from sale of mlk? 0-50%  50-100%

36. Monthly income *(ICC=0.97, p=0.004)*

37. Schooling attained:

- Illiterate  Secondary complete   
 Primary incomplete  University   
 Primary complete   
 Secondary incomplete

38. Altitude of farm:

39. Location of the farm :

|             |                                                                                                                             |                                                                                                                             |                                                                                                                             |                                                                                                                             |                                                                                                                             |
|-------------|-----------------------------------------------------------------------------------------------------------------------------|-----------------------------------------------------------------------------------------------------------------------------|-----------------------------------------------------------------------------------------------------------------------------|-----------------------------------------------------------------------------------------------------------------------------|-----------------------------------------------------------------------------------------------------------------------------|
| CMT results | <input type="checkbox"/> Negative<br><input type="checkbox"/> 1<br><input type="checkbox"/> 2<br><input type="checkbox"/> 3 | <input type="checkbox"/> Negative<br><input type="checkbox"/> 1<br><input type="checkbox"/> 2<br><input type="checkbox"/> 3 | <input type="checkbox"/> Negative<br><input type="checkbox"/> 1<br><input type="checkbox"/> 2<br><input type="checkbox"/> 3 | <input type="checkbox"/> Negative<br><input type="checkbox"/> 1<br><input type="checkbox"/> 2<br><input type="checkbox"/> 3 | <input type="checkbox"/> Negative<br><input type="checkbox"/> 1<br><input type="checkbox"/> 2<br><input type="checkbox"/> 3 |
|-------------|-----------------------------------------------------------------------------------------------------------------------------|-----------------------------------------------------------------------------------------------------------------------------|-----------------------------------------------------------------------------------------------------------------------------|-----------------------------------------------------------------------------------------------------------------------------|-----------------------------------------------------------------------------------------------------------------------------|
